1 **The Proteome Landscape of Human Placentas for**  
2 **Monochorionic Twins with Selective Intrauterine Growth**  
3 **Restriction**

4

5 Xin-Lu Meng<sup>1,#</sup>, Peng-Bo Yuan<sup>1,#</sup>, Xue-Ju Wang<sup>1</sup>, Jing Hang<sup>2,3,4,5</sup>, Xiao-Ming Shi<sup>1</sup>,  
6 Yang-Yu Zhao<sup>1,\*</sup>, Yuan Wei<sup>1,\*</sup>

7

8 <sup>1</sup> *Department of Obstetrics and Gynecology, Peking University Third Hospital,*  
9 *Beijing 100191, China*

10 <sup>2</sup> *Center for Reproductive Medicine, Department of Obstetrics and Gynecology,*  
11 *Peking University Third Hospital, Beijing 100191, China*

12 <sup>3</sup> *Key Laboratory of Assisted Reproduction, Ministry of Education, Beijing 100191,*  
13 *China*

14 <sup>4</sup> *Beijing Key Laboratory of Reproductive Endocrinology and Assisted Reproduction,*  
15 *Beijing 100191, China*

16 <sup>5</sup> *National Clinical Research Center for Obstetrics and Gynecology, Beijing 100191,*  
17 *China*

18

19 # Equal contribution.

20 \* Corresponding authors.

21 E-mail: [weiyuanbysy@163.com](mailto:weiyuanbysy@163.com) (Wei Y), [zhaoyangyu@bjmu.edu.cn](mailto:zhaoyangyu@bjmu.edu.cn) (Zhao YY).

22

23 **Abstract**

24 In perinatal medicine, intrauterine growth restriction (IUGR) is one of the greatest  
25 challenges. The etiology of IUGR is multifactorial, but most cases are thought to arise  
26 from placental insufficiency. However, identifying the placental cause of IUGR can  
27 be difficult due to numerous confounding factors. Selective IUGR (sIUGR) would be  
28 a good model to investigate how impaired placentation affects fetal development, as  
29 the growth discordance between monochorionic twins cannot be explained by  
30 confounding genetic or maternal factors. Herein we constructed and analyzed the  
31 placental proteomic profiles of IUGR twins and the normal cotwins. Specifically, we  
32 identified a total of 5481 proteins and 233 differentially expressed proteins (DEPs),  
33 including 57 upregulated and 176 downregulated DEPs in IUGR twins. Bioinformatic  
34 analysis indicates that these DEPs are mainly associated with cardiovascular system  
35 development and function, organismal survival, and organismal development. Notably,  
36 34 DEPs are significantly enriched in angiogenesis, and diminished placental  
37 angiogenesis in IUGR twins has been further elaborately confirmed. Moreover, we  
38 found decreased expression of *metadherin* (*MTDH*) in placentas for IUGR twins and  
39 demonstrated that *MTDH* contributes to placental angiogenesis and fetal growth *in*  
40 *vitro*. Collectively, our findings reveal the comprehensive proteomic signature of  
41 placentas for sIUGR twins, and the DEPs identified may provide in-depth insights  
42 into pathogenesis of placental dysfunction and subsequent impaired fetal growth.

43

44 **KEYWORDS:** Selective intrauterine growth restriction; Placenta; Proteome;  
45 Angiogenesis; *Metadherin*

46

## 47 **Introduction**

48 Intrauterine growth restriction (IUGR), which refers to the inability of the fetus to  
49 reach its full growth potential, is among the most common pregnancy complications  
50 and affects 7% of pregnancies worldwide [1]. Besides contributing to significant  
51 perinatal and pediatric morbidity and mortality, it can also raise the risk of developing  
52 metabolic, cardiovascular, and respiratory disorders later in life [2,3]. Despite the  
53 involvement of multiple factors, placental insufficiency has been reported as a major  
54 cause of IUGR [4,5]. Placental insufficiency refers to a process of progressive  
55 deterioration of placental function. It reduces transplacental oxygen and nutrients  
56 transfer to the growing fetus, and ultimately limits placental performance during  
57 pregnancy [6,7]. However, identifying the molecular mechanisms underlying  
58 pathogenesis of placental insufficiency is challenging due to the interference of  
59 numerous maternal and genetic confounding factors.

60 Selective IUGR (sIUGR) is a unique complication of monochorionic (MC) twins  
61 in which one twin is an IUGR fetus and the cotwin grows normally. An estimated  
62 10%–15% of MC pregnancies suffer from it [8]. Several studies have extensively  
63 investigated the development of sIUGR at the gross histopathological level and have  
64 shown that sIUGR is associated with a remarkable discordance of placental sharing  
65 wherein the IUGR twin is supported by a smaller portion of the placenta. Also, a  
66 higher incidence of abnormal cord insertion occurs in the smaller fetuses [9,10].  
67 Additionally, the terminal branch levels of the placental artery and vein were  
68 significantly lower in the IUGR twins [11]. Together, these morphological alterations  
69 suggest placental insufficiency and impaired blood perfusion to the fetus in sIUGR.  
70 The two fetuses harbor an identical genotype and share the same maternal  
71 environment. Thus, sIUGR twins would provide an ideal model to investigate the  
72 underlying mechanisms of placental insufficiency by using the healthy cotwin as an  
73 internal control to eliminate confounding maternal and genetic factors and to ensure  
74 the same gestational age. Recent studies have found that dysregulation of several  
75 angiogenesis-related genes, such as *endoglin* and *fms-like tyrosine kinase 1 (FLT1)*,

76 may contribute to the development of sIUGR [12–14]. The *hypoxia inducible*  
77 *factor-1a (HIF1A)* mRNA levels, as well as 8-hydroxydeoxyguanosine (8-OHdG) and  
78 malondialdehyde (MDA), both biomarkers of oxidative stress, have been  
79 demonstrated to be significantly upregulated in IUGR twin placentas, suggesting that  
80 oxidative stress might participate in the pathogenesis of sIUGR [15]. In other studies,  
81 abnormal placental epigenetic modification, such as altered imprinted genes and DNA  
82 methylation, has been found to cause sIUGR [16,17]. However, a systematic placental  
83 proteomic profile linked with the functional analysis of clinical sIUGR is still absent.

84 In this study, we systematically investigated the placental proteome differences  
85 between IUGR twins and the normal cotwins utilizing tandem mass tag (TMT)-based  
86 technology. In total, we identified 5481 proteins and 233 differentially expressed  
87 proteins (DEPs), of which 57 were upregulated and 176 were downregulated.  
88 Bioinformatic analysis by ingenuity pathway analysis (IPA) revealed that these DEPs  
89 were most significantly enriched in cardiovascular system development and function,  
90 as well as organismal survival and organismal development. Notably, 34 DEPs were  
91 associated with the biological process of angiogenesis, and we found that  
92 angiogenesis was significantly impaired in IUGR twin placentas. The differential  
93 expression of *ephrin B2 (EFNB2)*, *vimentin (VIM)* and *methionyl aminopeptidase 2*  
94 (*METAP2*), which are essential in placental angiogenesis, was validated by PCR and  
95 immunohistochemistry analysis. In addition, we found that *metadherin (MTDH)* was  
96 significantly downregulated in IUGR twin placentas. Knockdown of *MTDH* in human  
97 umbilical vein endothelial cells (HUVECs) obviously inhibited the proliferation,  
98 migration, tube formation, and spheroid sprouting by affecting numerous genes and  
99 biological processes. In brief, our study is the first comprehensive analysis of the  
100 placental proteomic profile in sIUGR twins and may offer deeper insights into the  
101 molecular mechanisms of IUGR.

102

## 103 **Results**

### 104 **Clinical characteristics**

105 To identify novel candidate molecules for sIUGR, we harvested 12 placental samples  
106 from six sIUGR twin pairs and performed TMT-based comparative proteomic  
107 analysis. sIUGR twins, which share the maternal environment and harbor an identical  
108 genotype, provide an ideal model for investigating the association between placental  
109 development and fetal growth. The demographics and clinical characteristics of the  
110 twin pregnancies in this study are presented in Table S1 and Figure S1A–D. All twins  
111 were delivered alive by cesarean section at a mean gestational age of  $32.3 \pm 1.2$  weeks.  
112 The birth weight of the IUGR twins was, on average, 628 grams lower than that of  
113 their healthy cotwins ( $P = 0.0004$ ), with relative birth weight discordance ranging  
114 from 25.2% to 48.0%. None of the study population had twin-to-twin transfusion  
115 syndrome, fetal malformations, and maternal complications such as preeclampsia or  
116 diabetes mellitus. In addition, IUGR twin placentas exhibited more pathological  
117 abnormalities, including distal villous hypoplasia, intervillous fibrin deposition,  
118 increased syncytial knots, and abnormal cord insertion. (Figure S1E–I).

### 119 **Comparative proteomic analysis identifies 233 DEPs in IUGR twin placentas**

120 To comprehensively profile the global placental proteomic changes between IUGR  
121 twins and normal cotwins, we applied a high-accuracy quantitative proteomic  
122 approach to analyze protein expression (**Figure 1A**). A total of 12 samples from 6  
123 pairs of sIUGR twins were processed in the same experimental period. After protein  
124 extraction, reduction, alkylation, and digestion, each 3 pairs of sIUGR twins were  
125 labeled with one set of six-plex TMT reagent (group 1: TMT 126, 127, and 128 for  
126 normal cotwin 1, 2, and 3; TMT 129, 130, and 131 for IUGR twin 1, 2, and 3  
127 respectively; group 2: TMT 126, 127, and 128 for normal cotwin 4, 5, and 6; TMT  
128 129, 130, and 131 for IUGR twin 4, 5, and 6 respectively). Six isobaric labeled  
129 samples within the same set were mixed together and then separated into 10 fractions  
130 by high pH reversed-phase liquid chromatography (RPLC). All 20 fractions from two  
131 TMT sets were subjected sequentially to liquid chromatography tandem mass  
132 spectrometry (LC-MS/MS). MS data were then collected and analyzed for protein  
133 identification and quantification. Details on MS data analysis were presented in the  
134 Methods section. Specifically, we identified a total of 5481 nonredundant proteins in

135 sIUGR twin placentas (Table S2). A histogram plot revealed the fold change (FC)  
136 distribution of all identified proteins (Figure 1B). The distribution of statistical  
137 significance ( $-\log_{10}$  transformed  $P$  value) and degree of change ( $\log_2$  transformed FC)  
138 for all identified proteins were presented in the volcano plot (Figure 1C). Using a  
139 combination of  $P < 0.05$  and  $|FC| > 1.3$ , 233 proteins displayed significant differential  
140 expression in IUGR twin placentas compared to the normal cotwin placentas. Of these,  
141 57 DEPs were upregulated and 176 DEPs were downregulated (Table S3).  
142 Unsupervised hierarchical clustering of the DEPs revealed good separation between  
143 the two groups (Figure 1D).

144 To deepen the biological insights into these DEPs, we utilized IPA software for  
145 bioinformatics analysis. The core biofunction analysis of these DEPs was divided into  
146 three categories. In “physiological system development and function” category, the  
147 most significantly enriched item was “cardiovascular system development and  
148 function”, which involved 52 DEPs. The other two main enriched subcategories were  
149 “organismal survival” (number of DEPs in this function [n] = 66) and “organismal  
150 development” (n = 71) (Figure 1E; Table S4). In addition, in “molecular and cellular  
151 function” category, the top three enriched functions included “cell death and survival”,  
152 “lipid metabolism”, and “molecular transport” (Figure S2A; Table S4). For “diseases  
153 and disorders”, the DEPs were significantly related to “endocrine system disorders”,  
154 “gastrointestinal disease”, and “metabolic disease” (Figure S2B; Table S4).  
155 Additionally, IPA canonical pathway analysis identified oxidative phosphorylation,  
156 mitochondrial dysfunction, and the Sirtuin signaling pathway as the top three  
157 pathways that might be potentially affected in IUGR twin placentas (Figure S2C).

### 158 **Angiogenesis is significantly impaired in IUGR twin placentas**

159 Among the 52 DEPs involved in “cardiovascular system development and function”,  
160 34 DEPs were enriched in the biological process of angiogenesis encompassed in this  
161 biofunction, and the state of angiogenesis was predicted to be suppressed by IPA  
162 (Figure 2A). Placental angiogenesis is crucial to villous development and placental  
163 function. Any impairment in placental angiogenesis can lead to poor placentation,  
164 decreased blood flow to the fetus, and various pregnancy complications [18]. To

165 confirm whether angiogenesis was altered in IUGR twin placentas, we assessed the  
166 microvessel density (MVD) and vascular area density per sample following  
167 immunostaining of CD34 as an endothelial cell marker. A significant decrease in  
168 MVD was present in IUGR twin placentas, while the vascular area density was also  
169 significantly lower in IUGR twin placentas than in the normal cotwins (Figure 2B–D).  
170 Taken together, these data suggested that impaired placental angiogenesis in IUGR  
171 twins might be responsible for the development of sIUGR. To further validate the  
172 proteomic results, we selected 3 markers (*EFNB2*, *VIM*, and *METAP2*) for  
173 immunohistochemistry analysis. The 3 markers were reported to play essential roles  
174 in placental angiogenesis and fetal development [19–21]. As shown in Figure 2E–H,  
175 the intensity of *VIM*, *EFNB2*, and *METAP2* immunoreactivity was significantly  
176 lower in IUGR twin placentas than in normal cotwins, which was in line with TMT  
177 proteomic results. Additionally, we performed qRT-PCR to explore their expression  
178 changes at mRNA level. Similar to the proteomic data, *VIM*, *EFNB2*, and *METAP2*  
179 mRNA expression levels were significantly downregulated in IUGR twin placentas  
180 (Figure 2I–K).

### 181 ***MTDH* silencing inhibits HUVEC proliferation and migration**

182 Among the 34 DEPs related to angiogenesis, we also observed a significant decrease  
183 in *MTDH* expression in IUGR twin placentas (Figure 3A–C). There is evidence that  
184 *MTDH* participates in tumor angiogenesis [22,23], while its role in placental  
185 angiogenesis remains unclear. During placental angiogenesis, endothelial cells  
186 undergo proliferative, migratory, and morphological events to form a vessel network.  
187 To investigate the causality between endothelial *MTDH* deficiency and sIUGR  
188 development, the role of *MTDH* in the proliferation and migration of HUVECs was  
189 explored. HUVECs were transfected with negative control siRNA (si-NC) and siRNA  
190 against *MTDH* (si-*MTDH*). Transfection with si-*MTDH* markedly decreased *MTDH*  
191 mRNA and protein levels (Figure 3D–F). The proliferation and migration abilities of  
192 HUVECs were examined using an electrical impedance-based tool, the  
193 xCELLigence® real-time cell analysis (RTCA) system, which enables continuous  
194 monitoring of cell behaviors and allows for real-time assessment of multiple cell

195 functions. For the proliferation assay, cells treated with si-NC or si-*MTDH* were  
196 seeded in the wells of an E-plate. Cells were cultured for 60 h, and the si-*MTDH*  
197 group exhibited a significant reduction in proliferation ability (Figure 3G). Cell  
198 migration was assessed using a CIM-16 plate with upper and lower chambers in each  
199 well. The results revealed that *MTDH* interference obviously decreased HUVEC  
200 migration ability compared with that of control cells (Figure 3H). To further confirm  
201 the effect of *MTDH* deficiency on HUVEC migration in the horizontal direction, we  
202 performed a wound healing assay. As expected, the wound in the  
203 si-*MTDH*-transfected cell culture healed more slowly than that of the control group  
204 (Figure 3I, J). In summary, these findings demonstrated that *MTDH* is vital to  
205 HUVECs proliferation and migration.

#### 206 **Knockdown of *MTDH* inhibits tube formation and spheroid sprouting in** 207 **HUVECs**

208 To further determine *MTDH*'s effect on placental angiogenesis, the 2-dimensional (2D)  
209 tube formation assay and 3-dimensional (3D) spheroid sprouting assay were  
210 conducted using HUVECs. As shown in **Figure 4A**, si-NC-transfected HUVECs  
211 could form capillary-like structures in a few hours on Matrigel, while the tube  
212 formation capacity was perturbed in the si-*MTDH* group. *MTDH* deficiency distinctly  
213 impaired the number and area of tubes, the total tube length, as well as the number of  
214 branching points (Figure 4B–E). Similarly, when embedded in 3D collagen I gels,  
215 spheroids composed of si-NC-transfected HUVECs retained the ability to produce  
216 capillary-like outgrowths, while only a few sprouts were formed in *MTDH*-depleted  
217 HUVEC spheroids (Figure 4F). Compared to the control cells, the si-*MTDH* HUVECs  
218 exhibited a significant reduction in cumulative sprout length (Figure 4G). Accordingly,  
219 these data suggest that downregulation of *MTDH* inhibits placental angiogenesis.

#### 220 ***MTDH* is required in placental development and fetal growth**

221 To verify whether *MTDH* is required in placental and fetal development, we knocked  
222 down *MTDH* in HUVECs and performed RNA-seq analysis. Both the control and  
223 si-*MTDH* groups had three biological replicates each. The correlation analysis based  
224 on the overall RNA-seq data for each sample pair showed that the correlation



225 coefficient between intra-group samples was higher than that between inter-group  
226 samples, indicating that samples within groups had strong resemblance in terms of  
227 transcription pattern and the biological experimental operations were reliable and  
228 reproducible, while the gene expression changed following MTDH interference.  
229 **(Figure 5A)**. The top 50 protein-coding genes with significantly differential  
230 expression (adjusted  $P < 0.05$ ) were selected as candidates for further analysis (Table  
231 S5). Among the 50 genes, 29 were upregulated and 21 were downregulated in the  
232 si-*MTDH* group. The expression profiles of the 50 genes are presented in a heatmap  
233 (Figure 5B). Further functional enrichment analysis revealed that 50 candidate genes  
234 were associated with various biological processes, such as defense responses,  
235 apoptotic processes, actin filament organization, negative regulation of cell  
236 proliferation, and angiogenesis (Figure 5C). The interaction network of the 50  
237 candidates is presented in Figure 5D.

238 Among the 50 candidates, we found quite a few genes previously reported to be  
239 implicated in placental dysfunction and fetal growth restriction, including *PSG3*  
240 (upregulation of *PSG3* in both maternal blood and IUGR placenta) [24,25], *CSF2*  
241 (*Csf2*-deficient *mice* exhibit placental insufficiency and fetal growth retardation)  
242 [26,27], *THSD7A* (higher expression of *THSD7A* is associated with low birth weight)  
243 [28], *CYP11B1* (lower methylation levels of *CYP11B1* are found in preterm delivery  
244 with reduced fetal growth) [29], and *PLCL1* (double-knockout *mice* for *Plcl1* and  
245 *Plcl2* exhibit reduced litter events and litter size) [30]. These results further provide  
246 support for the validity of our results. Interestingly, we also found several unreported  
247 genes that may affect placental development and fetal growth, such as *IFITM2*,  
248 *TMSB15A*, and *WAS*. These findings may help further the discovery of potential  
249 biomarkers and therapeutic targets.

250

## 251 **Discussion**

252 Despite advances in perinatal care, IUGR remains a challenging problem faced by  
253 obstetricians worldwide. Placental insufficiency and subsequent undernutrition and

254 hypoxia are considered to be the ultimate pathomechanisms that disturb fetal growth  
255 [31]. However, the molecular regulatory mechanisms of IUGR have not been fully  
256 elucidated due to genetic and maternal heterogeneity. In monochorionic twin  
257 pregnancy, the IUGR twin and the normal cotwin have an identical genotype and  
258 develop in the same uterus, making it an excellent model to investigate placental  
259 disorders [32]. Proteins, which act as the ultimate executors of gene function, are vital  
260 players within organisms in terms of functionality and structure [33]. Thus,  
261 investigating the molecular basis for IUGR at the protein level is of paramount  
262 importance to shed light on its clinical diagnosis and treatment. Based on the above  
263 information, we sought to construct a comprehensive profile of the placental DEPs by  
264 taking advantage of sIUGR twins. In this work, we performed TMT-based  
265 comparative proteomic studies using placental samples of six sIUGR twin pairs from  
266 the clinic. A total of 5481 unique proteins with high confidence were detected in  
267 human placental tissues. Therein, 233 proteins were identified as DEPs between  
268 IUGR twin and normal cotwin placentas, with 57 upregulated and 176 downregulated.

269 In the current work, numerous proteins relevant to embryonic development were  
270 found to be dysregulated in IUGR twin placentas. As the interface of interaction and  
271 communication between mother and fetus, the placenta is essential to embryo  
272 development and, in particular, to fetal growth [34]. The aberrant expression of these  
273 proteins in IUGR twin placentas implies that they may play key roles in impairing  
274 fetal growth potential. In addition, a set of proteins that can modulate lipid  
275 metabolism were detected in our study. Over the past few decades, lipid metabolism  
276 during pregnancy has been highlighted as essential not only for optimal placental  
277 development and function but also for proper intrauterine growth of the fetus [35].  
278 Disrupted lipid metabolism may contribute to placental insufficiency and suboptimal  
279 fetal growth, which is consistent with previous discoveries in singleton IUGR cases  
280 [36,37]. In addition, proteins that are key players in molecular transport appeared  
281 prominently among the top functional terms. In fact, the formation of an efficient  
282 transport interface is the essence of the placenta, which allows the growing fetus to  
283 fulfill its developmental demands from maternal circulation [34]. Alterations in

284 nutrient transporter expression have also been evidenced in IUGR placentas [38,39].

285 Notably, we found that 34 DEPs were implicated in angiogenesis. Adequate  
286 angiogenesis ensures that placentas develop as highly vascularized organs, thereby  
287 supporting the blood flow required for fetal growth [40]. Aberrant placental  
288 vasculature has been identified in nearly all human pregnancy complications, further  
289 confirming the importance of placental angiogenesis for normal pregnancy [41]. A  
290 previous study discovered significantly decreased villus vascular density in placentas  
291 of singleton IUGR [42]. Our results also confirmed that placental MVD and vascular  
292 area density were significantly lower in smaller fetuses. These results together suggest  
293 that impairment of placental angiogenesis may play key roles in the incidence and  
294 development of IUGR. *MTDH*, also known as *AEG-1*, is implicated as an oncogene  
295 [43,44]. According to our findings, *MTDH* was significantly downregulated in IUGR  
296 twin placentas and located in intravillous capillary endothelial cells. In addition, we  
297 verified that the function of *MTDH* is critical in placental angiogenesis, indicating that  
298 decreased expression of *MTDH* may contribute to the pathogenesis of placental  
299 dysfunction and fetal growth retardation. While our understanding of the molecular  
300 mechanisms of IUGR has advanced significantly over the past few decades, there are  
301 currently no reliable diagnostic biomarkers or targeted therapies available for this  
302 disease in clinical practice [45,46]. Translational application of the candidate targets  
303 identified in singleton IUGR pregnancies is very limited, probably mainly due to the  
304 heterogeneity of the samples in these studies. Thus, *MTDH* identified in our  
305 investigation using sIUGR twins may serve as a potential biomarker for early  
306 prediction and accurate diagnosis of IUGR, as well as a novel target for future  
307 treatment. In summary, our findings comprehensively described the proteomic  
308 landscape of sIUGR twin placentas, which may provide reliable resources for  
309 mechanistic studies of the core regulators involved in placental dysfunction and fetal  
310 growth restriction.

311

312 **Materials and methods**

313 **Patients and clinical specimen collection**

314 Placental samples from 6 sIUGR twins were collected at Peking University Third  
315 Hospital. Ultrasonography at 11–14 weeks was conducted to determine the  
316 chorionicity, and postnatal placental examination was used to confirm it. sIUGR  
317 refers to a monochorionic twin in which the estimated fetal weight (EFW) of one  
318 fetus is lower than 10th percentile while the cotwin's is normal and the intertwin EFW  
319 discordance is more than 25%. EFW was calculated based on Hadlock formula [47].  
320 EFW discordance was calculated with this formula: (normal cotwin EFW–IUGR twin  
321 EFW)/normal cotwin EFW. All participants underwent cesarean delivery, and the  
322 samples were collected within 30 min. Samples were obtained from the maternal side  
323 of the placental lobules within 2 cm of each umbilical cord insertion site, aiming to  
324 reduce possible bias caused by the regional variations in placental gene expression  
325 associated with the sampling sites [48,49]. The placental biopsies were excised in  
326 areas free of macroscopic lesions of calcification or infarction after removing the  
327 maternal deciduas and fetal membranes. The biopsy was washed in PBS for blood  
328 removal. A portion of the sample was stored at –80°C after freezing in liquid nitrogen.  
329 The rest was fixed in 10% formalin solution followed by embedding in paraffin.

330 **Protein extraction, digestion, and TMT labeling**

331 Placental tissues were lysed using 7 M urea with 1% (w/v) dithiothreitol (DTT), 2 M  
332 thiourea, and 1% (v/v) protease inhibitor cocktail. Equal amounts of protein (100  
333 µg/sample) were used for subsequent processing. 1 M DTT was used for peptide  
334 reduction at 56°C for 30 min and 1 M iodoacetamide for alkylation at room  
335 temperature for 30 min in darkness. Samples were diluted with 25 mM (pH 8.2)  
336 Tris-HCl and 0.1 M CaCl<sub>2</sub> until the final concentration of urea was 1 mM. Trypsin  
337 (Catalog No. V5111, Promega, Madison, WI) was used to digest proteins for 12 h.  
338 The resulting peptides were desalted on Sep-Pak C18 columns (Waters, Altrincham  
339 Road, Wilmslow, UK), and then labeled with two sets of six-plex TMT reagents  
340 (Catalog No. 90062, Thermo Fisher Scientific, Waltham, MA). Each 6 isobaric  
341 labeled samples within the same set were combined and vacuum dried for further  
342 analysis.

343 **LC-MS/MS**

344 The peptide mixture was separated into 10 fractions by high pH RPLC using BEH  
345 C18 columns (1.7  $\mu\text{m}$ , 1.0 mm  $\times$  150 mm) attached to the H-Class System (Waters).  
346 The second-dimensional liquid chromatography separation of the peptides was  
347 conducted on the Ekspert<sup>TM</sup> nano LC 415 instrument (AB Sciex, Toronto, Canada).  
348 The peptides were eluted using 2% acetonitrile with 0.1% formic acid as buffer A and  
349 98% acetonitrile with 0.1% formic acid as buffer B with a gradient of 100 min. The  
350 eluted peptides were subsequently analyzed using TripleTOF 5600+ mass  
351 spectrometer (AB Sciex). Data were obtained in positive ion mode. For TOF-MS scan,  
352 the mass range was set as 350–1500  $m/z$ . The MS/MS scan was carried out with a  
353 mass range of 100–1500  $m/z$ .

354 **Data analysis**

355 The raw data were analyzed by using the MaxQuant software (Version 1.5.2.8) [50]  
356 and the human UniProt reference protein sequences [51] to generate initial  
357 spectra-peptide matches and quantification values. The search was performed with the  
358 following parameters: enzyme, trypsin/p; max missed cleavages, 2; 0.1 Da for first  
359 search mass tolerance; 0.01 Da for main search mass tolerance; variable modifications,  
360 acetylation (N-term) and oxidation (M); fixed modification, carbamidomethyl (C).  
361 Protein identification requires at least one unique peptide. False discovery rate (FDR)  
362 was 0.05 for both peptide and protein identification. Then, the MaxQuant results were  
363 further processed by the MaxReport software [52] to correct and optimize the  
364 quantitative results. In brief, the reporting intensity of each isobaric label was  
365 corrected by an impurity correction matrix. Additionally, each label (sample) was  
366 normalized by the total intensity. Then, the relative protein expressions were  
367 calculated by the Libra algorithm [53]. Finally, DEPs were determined by  $P < 0.05$   
368 and  $|\text{FC}| > 1.3$ . The MaxReport quantification workflow was also successfully tested  
369 by using a benchmark dataset (PXD000001) to quantify the spiked reference proteins.  
370 Additionally, all of the samples were harvested and processed in the same  
371 experimental period. Due to the limited number of TMT labels, these samples were  
372 labeled separately and loaded into the mass spectrometer in a sequential process.

373 Comparison of the average intensities and unique peptides between the two six-plex  
374 TMT experiments indicated that there was a minor batch effect between the two  
375 groups, as the Pearson correlation coefficient values for intensities and peptides were  
376 0.96 and 0.98, respectively. Considering only two sequential batches in this study, we  
377 did not perform such correction. The global protein expression patterns of sIUGR  
378 twin placentas were illustrated using histograms and volcano plots in the R package  
379 (version 3.5.2). Hierarchical cluster analysis of the DEPs was performed with MeV  
380 software (version 4.9.0). We used IPA software (QIAGEN, Redwood City, CA) to  
381 identify the biofunctions that were significantly associated with the DEPs.  
382 Specifically, the list of DEPs, containing gene symbols, fold changes and *P* values,  
383 was uploaded into IPA software for core analysis. The core analysis included  
384 enrichment of diseases and functions, canonical pathways, and networks. The core  
385 analysis was conducted with the setting of direct and indirect relationships between  
386 focused genes based on the human section of “Ingenuity Knowledge Base”, which  
387 was a manually curated database of biological interactions and functional annotations.

### 388 **Immunohistochemistry**

389 After deparaffinization, antigen retrieval and endogenous peroxide blocking, the  
390 sections (5  $\mu$ m in thickness) were incubated with primary anti-CD34 antibody  
391 (Catalog No. ZM-0046, ZSGB-BIO, Beijing, China), anti-EFNB2 antibody (1:50;  
392 Catalog No. HPA008999, Atlas Antibodies, Bromma, Sweden), anti-METAP2  
393 antibody (1:3000; Catalog No. HPA019095, Atlas Antibodies), anti-VIM antibody  
394 (Catalog No. ZM-0260, ZSGB-BIO) and anti-MTDH antibody (1:150; Catalog No.  
395 ab124789, Abcam, Cambridge, UK). After incubating with secondary antibodies, the  
396 sections were stained with diaminobenzidine solution (Catalog No. ZLI-9018,  
397 ZSGB-BIO). The expression level of the target genes was assessed with Image-Pro  
398 Plus (Media Cybernetics, Rockville, MD).

### 399 **MVD and vascular area density**

400 Using CD34 as an endothelial cell marker, the MVD was used to evaluate placental  
401 angiogenesis by measuring the immunostaining of CD34 in placental sections. Briefly,  
402 the number of CD34-positive vessels was counted under a magnification of 400 $\times$  in 5

403 nonconsecutive fields by two observers who were blinded to the control and case  
404 groups. The mean value of the 5 fields was expressed as the MVD. The vascular area  
405 density was evaluated as follows: 5 images per slide with a magnification of  $\times 200$   
406 were captured by NanoZoomer-SQ (Catalog No. C13140-01, Hamamatsu, Shizuoka,  
407 Japan) and NDP.view2 software (Hamamatsu). Image-Pro Plus (Media Cybernetics)  
408 was used for measurement of the vascular area and the villous area. The mean of the  
409 percentage of vascular area in villous area in 5 images was defined as the vascular  
410 area density.

#### 411 **RNA extraction and qRT-PCR**

412 RNA was extracted using TRIzol (Catalog No. 15596018, Thermo Fisher Scientific),  
413 and then reverse-transcribed into cDNA. qRT-PCR was conducted with the SYBR<sup>TM</sup>  
414 Green Master Mix reagent (Catalog No. A25742, Thermo Fisher Scientific). Internal  
415 reference gene was *glyceraldehyde-3-phosphate dehydrogenase (GAPDH)*. All  
416 experiments were replicated three times independently. Sangon Biotech Corporation  
417 (Shanghai, China) supplied the primers (Table S6).

#### 418 **Cell culture**

419 Immortalized HUVECs were a generous gift from Peking University Third Hospital  
420 Medical Research Center. HUVECs were cultured in DMEM/F-12 medium (Catalog  
421 No. C11330500BT, Thermo Fisher Scientific) containing 1% penicillin/streptomycin  
422 (Catalog No. V900929, Sigma-Aldrich, St. Louis, MO) as well as 10% fetal bovine  
423 serum (FBS) (Catalog No. 10099141, Thermo Fisher Scientific) at 37°C with 5% CO<sub>2</sub>.  
424 HUVECs were authenticated with short tandem repeat analysis.

#### 425 **Cell transfection**

426 Transient transfection of HUVECs with siRNA was performed at 70% confluence in  
427 six-well plates using Lipofectamine 3000 (Catalog No. L3000015, Thermo Fisher  
428 Scientific). *MTDH* siRNA sequences were as follows: sense, (5'–3')  
429 GGAACCAAUCCUGAUGAUTT; antisense (5'–3')  
430 AUCAUCAGGAAUUGGUUCCTT. The siRNA was synthesized by GenePharma  
431 (Shanghai, China).

#### 432 **Western blotting**

433 Proteins (20 mg for each sample) were electrophoresed on 8% SDS-PAGE gels and  
434 then transferred to polyvinylidene fluoride membranes (Catalog No. IPVH00010,  
435 Millipore Bedford, MA). The membranes were blocked in 5% nonfat dry milk  
436 followed by incubating with anti-MTDH antibody (1:10,000; Catalog No. ab124789,  
437 Abcam) and anti-GAPDH antibody (1:5000; Catalog No. ab8245, Abcam) overnight  
438 at 4°C. After incubating with secondary antibodies, the bands were revealed with an  
439 enhanced ECL Kit (Catalog No. BF06053-500, Biodragon, Beijing, China) and  
440 analyzed by ImageJ (National Institutes of Health, NIH) using GAPDH as the loading  
441 control.

#### 442 **Real-time cell proliferation and migration assays**

443 The RTCA analyzer (ACEA Biosciences, San Diego, CA) was used to examine cell  
444 proliferation and migration abilities. The cell proliferation assay was carried out on  
445 the E-plate with each well consisting of  $5 \times 10^3$  cells treated with si-*MTDH* or  
446 si-NC. The impedance of each well, expressed as the cell index (CI), was  
447 automatically measured every 30 min for 60 h. The migration assay was performed in  
448 a CIM-16 plate. A total of  $2 \times 10^4$  transfected cells were seeded into the upper  
449 chamber with serum-free medium, while it was complete medium in the lower  
450 chamber. Scans were run with sweeps every 15 min for 60 h. The impedance of each  
451 well was also represented by the CI.

#### 452 **Wound healing assay**

453 In 6-well plates,  $5 \times 10^5$  HUVECs transfected with either si-*MTDH* or si-NC were  
454 seeded per well. When cells reached confluence, scratches were made with 200- $\mu$ l  
455 pipette tips. Afterwards, serum-free medium was used for cell culture, and images  
456 were captured every 12 h for a total of 24 h. The NIH ImageJ software was applied to  
457 analyze the cell migration distance.

#### 458 **Tube formation assay**

459 In 96-well plates, 60  $\mu$ l of Matrigel (Catalog No. 356234, BD Biosciences, Bedford,  
460 MA) was placed in each well, which was then solidified at 37°C for 30 min.  
461 Transfected HUVECs ( $2 \times 10^4$ /well) were seeded into Matrigel-coated wells and  
462 cultured for 8 h. After that, the medium was discarded, and the cells were labeled with



463 2  $\mu$ M calcein AM fluorescent dye (Catalog No. ab141420, Abcam) at 37°C for 20 min.  
464 The LeicaDMI4000B inverted microscope was used to observe the capillary-like  
465 structures, and images were taken using a Leica DFC345FX camera. The number and  
466 area of the formed tubes, the number of junctions, as well as the total branching  
467 length were quantified using ImageJ software (NIH). Experiments were performed 3  
468 times independently.

#### 469 **Spheroid sprouting assay**

470 As previously described, we performed the 3D sprouting assay [54]. HUVECs were  
471 harvested after 24 h of transfection with either si-*MTDH* or si-NC to generate  
472 endothelial cell spheroids. Briefly, HUVECs ( $1 \times 10^3$ /well) were added into  
473 nonadherent round-bottom 96-well plates, and the cells spontaneously formed a single  
474 EC spheroid in each well within 24 h. The spheroids were then embedded in collagen  
475 gel and cultured for 48 h. A LeicaDMI4000B inverted microscope was used to  
476 observe the spheroids after labeling with calcein AM. ImageJ software (NIH) was  
477 used to measure all sprouts originating from each spheroid. The cumulative sprout  
478 length of 10 spheroids were compared between the 2 groups. The experiments were  
479 replicated 3 times independently.

#### 480 **RNA-seq and data analysis**

481 RNA was isolated and quality controlled. The cDNA libraries of transfected HUVECs  
482 were constructed and purified, followed by sequencing on Illumina NovaSeq platform.  
483 Clean reads were achieved by processing raw data with in-house Perl scripts. HISAT2  
484 was used for reads alignment and featureCounts for counting reads. DESeq2 was  
485 applied for differentially expressed genes identification (adjusted  $P < 0.05$ ). DAVID  
486 v6.8 was used for gene ontology (GO) analysis. GeneMANIA was carried out to  
487 construct protein-protein interaction network.

#### 488 **Statistical analysis**

489 Proliferation and migration curves were estimated by two-way ANOVA using SPSS  
490 software version 25.0. Paired  $t$ -test was applied to compare the differences between  
491 IUGR twins and the normal cotwins. All other data comparisons were conducted with  
492 Student's  $t$ -test.  $P < 0.05$  was considered statistically significant.

493

#### 494 **Ethical statement**

495 Ethical approval of our study was achieved from the Ethics Committee of the Peking  
496 University Third Hospital (IRB00006761-2016145). Prior to placental samples  
497 collection, written informed consent was obtained from participants.

498

#### 499 **Data availability**

500 The placental proteomic data of sIUGR twins have been uploaded to the iProX  
501 database (<https://www.iprox.org/>) [55], and are accessible with the dataset identifier  
502 IPX0004712000. The RNA-seq data of HUVECs have been submitted to the Genome  
503 Sequence Archive (GSA: HRA002656) at <https://ngdc.cncb.ac.cn/gsa-human/> [56].

504

#### 505 **Competing interests**

506 All authors declare no competing interests.

507

#### 508 **Acknowledgments**

509 Our investigation was supported by the National Natural Science Foundation of China  
510 (Grant Nos. 81971399 and 82171661).

511

#### 512 **References**

- 513 [1] Romo A, Carceller R, Tobajas J. Intrauterine growth retardation (IUGR):  
514 epidemiology and etiology. *Pediatr Endocrinol Rev* 2009;6:332–6.
- 515 [2] Bernstein IM, Horbar JD, Badger GJ, Ohlsson A, Golan A. Morbidity and  
516 mortality among very-low-birth-weight neonates with intrauterine growth  
517 restriction. *Am J Obstet Gynecol* 2000;182:198–206.
- 518 [3] Barker DJ. The fetal and infant origins of adult disease. *BMJ* 1990;301:1111.
- 519 [4] Regnault TR, Galan HL, Parker TA, Anthony RV. Placental development in  
520 normal and compromised pregnancies-- a review. *Placenta*. 2002;23:S119–29.

- 521 [5] Chaddha V, Viero S, Huppertz B, Kingdom J. Developmental biology of the  
522 placenta and the origins of placental insufficiency. *Semin Fetal Neonatal Med*  
523 2004;9:357–69.
- 524 [6] Gagnon R. Placental insufficiency and its consequences. *Eur J Obstet Gynecol*  
525 *Reprod Biol* 2003;110:S99–107.
- 526 [7] Neerhof MG, Thaete LG. The fetal response to chronic placental insufficiency.  
527 *Semin Perinatol* 2008;32:201–5.
- 528 [8] Bennasar M, Eixarch E, Martinez JM, Gratacós E. Selective intrauterine growth  
529 restriction in monochorionic diamniotic twin pregnancies. *Semin Fetal Neonatal*  
530 *Med* 2017;22:376–82.
- 531 [9] Lopriore E, Pasman SA, Klumper FJ, Middeldorp JM, Walther FJ, Oepkes D.  
532 Placental characteristics in growth-discordant monochorionic twins: a matched  
533 case-control study. *Placenta* 2012;33:171–4.
- 534 [10] Kalafat E, Thilaganathan B, Papageorgiou A, Bhide A, Khalil A. Significance  
535 of placental cord insertion site in twin pregnancy. *Ultrasound Obstet Gynecol*  
536 2018;52:378–84.
- 537 [11] Gou C, Li M, Zhang X, Liu X, Huang X, Zhou Y, et al. Placental characteristics  
538 in monochorionic twins with selective intrauterine growth restriction assessed by  
539 gradient angiography and three-dimensional reconstruction. *J Matern Fetal*  
540 *Neonatal Med* 2017;30:2590–5.
- 541 [12] Chu S, Mao Q, Shapiro S, De Paepe ME. Placental endoglin levels in  
542 diamniotic-mono chorionic twin gestations: correlation with clinical and placental  
543 characteristics. *Placenta* 2013;34:261–8.
- 544 [13] Schrey S, Kingdom J, Baczyk D, Fitzgerald B, Keating S, Ryan G, et al. *Leptin* is  
545 differentially expressed and epigenetically regulated across monochorionic twin  
546 placenta with discordant fetal growth. *Mol Hum Reprod* 2013;19:764–72.
- 547 [14] Nevo O, Many A, Xu J, Kingdom J, Piccoli E, Zamudio S, et al. Placental  
548 expression of soluble *fms-like tyrosine kinase 1* is increased in singletons and  
549 twin pregnancies with intrauterine growth restriction. *J Clin Endocrinol Metab*  
550 2008;93:285–92.
- 551 [15] Zhang GL, He ZM, Shi XM, Gou CY, Gao Y, Fang Q. Discordant *HIF1A*  
552 mRNA levels and oxidative stress in placental shares of monochorionic twins  
553 with selective intra-uterine growth restriction. *Placenta* 2015;36:297–303.
- 554 [16] Gou C, Liu X, Shi X, Chai H, He ZM, Huang X, et al. Placental expressions of  
555 *CDKN1C* and *KCNQ1OT1* in monozygotic twins with selective intrauterine  
556 growth restriction. *Twin Res Hum Genet* 2017;20:389–94.
- 557 [17] Roifman M, Choufani S, Turinsky AL, Drewlo S, Keating S, Brudno M, et al.  
558 Genome-wide placental DNA methylation analysis of severely growth-discordant  
559 monochorionic twins reveals novel epigenetic targets for intrauterine growth  
560 restriction. *Clin Epigenetics* 2016;8:70.

- 561 [18] Reynolds LP, Redmer DA. Angiogenesis in the placenta. *Biol Reprod*  
562 2001;64:1033–40.
- 563 [19] Antfolk D, Sjoqvist M, Cheng F, Isoniemi K, Duran CL, Rivero-Muller A, et al.  
564 Selective regulation of Notch ligands during angiogenesis is mediated by  
565 *vimentin*. *Proc Natl Acad Sci U S A* 2017;114:E4574–81.
- 566 [20] Wang HU, Chen ZF, Anderson DJ. Molecular distinction and angiogenic  
567 interaction between embryonic arteries and veins revealed by *ephrin-B2* and its  
568 receptor *Eph-B4*. *Cell* 1998;93:741–53.
- 569 [21] Yeh JJ, Ju R, Brdlik CM, Zhang W, Zhang Y, Matyskiela ME, et al. Targeted  
570 gene disruption of methionine aminopeptidase 2 results in an embryonic  
571 gastrulation defect and endothelial cell growth arrest. *Proc Natl Acad Sci U S A*  
572 2006;103:10379–84.
- 573 [22] Liu Y, Kong X, Li X, Li B, Yang Q. Knockdown of *metadherin* inhibits  
574 angiogenesis in breast cancer. *Int J Oncol* 2015;46:2459–66.
- 575 [23] Long M, Dong K, Gao P, Wang X, Liu L, Yang S, et al. Overexpression of  
576 *astrocyte-elevated gene-1* is associated with cervical carcinoma progression and  
577 angiogenesis. *Oncol Rep* 2013;30:1414–22.
- 578 [24] Whitehead CL, Walker SP, Ye L, Mendis S, Kaitu'u-Lino TJ, Lappas M, et al.  
579 Placental specific mRNA in the maternal circulation are globally dysregulated in  
580 pregnancies complicated by fetal growth restriction. *J Clin Endocrinol Metab*  
581 2013;98:E429–36.
- 582 [25] McMinn J, Wei M, Schupf N, Cusmai J, Johnson EB, Smith AC, et al.  
583 Unbalanced placental expression of imprinted genes in human intrauterine  
584 growth restriction. *Placenta* 2006;27:540–9.
- 585 [26] Sferruzzi-Perri AN, Macpherson AM, Roberts CT, Robertson SA. *Csf2* null  
586 mutation alters placental gene expression and trophoblast glycogen cell and giant  
587 cell abundance in *mice*. *Biol Reprod* 2009;81:207–21.
- 588 [27] Robertson SA, Roberts CT, Farr KL, Dunn AR, Seamark RF. Fertility  
589 impairment in granulocyte-macrophage colony-stimulating factor-deficient *mice*.  
590 *Biol Reprod* 1999;60:251–61.
- 591 [28] Lambertini L, Li Q, Ma Y, Zhang W, Hao K, Marsit C, et al. Placental imprinted  
592 gene expression mediates the effects of maternal psychosocial stress during  
593 pregnancy on fetal growth. *J Dev Orig Health Dis* 2019;10:196–205.
- 594 [29] Chen X, Bai G, Scholl TO. Spontaneous preterm delivery, particularly with  
595 reduced fetal growth, is associated with DNA hypomethylation of tumor related  
596 genes. *J Pregnancy Child Health* 2016;3:215.
- 597 [30] Matsuda M, Tsutsumi K, Kanematsu T, Fukami K, Terada Y, Takenawa T, et al.  
598 Involvement of phospholipase C-related inactive protein in the mouse  
599 reproductive system through the regulation of gonadotropin levels. *Biol Reprod*  
600 2009;81:681–9.

- 601 [31] Audette MC, Kingdom JC. Screening for fetal growth restriction and placental  
602 insufficiency. *Semin Fetal Neonatal Med* 2018;23:119–25.
- 603 [32] Li W, Chung CYL, Wang CC, Chan TF, Leung MBW, Chan OK, et al.  
604 Monochorionic twins with selective fetal growth restriction: insight from  
605 placental whole-transcriptome analysis. *Am J Obstet Gynecol*  
606 2020;223:749.e1–16.
- 607 [33] Li X, Wang W, Chen J. Recent progress in mass spectrometry proteomics for  
608 biomedical research. *Sci China Life Sci* 2017;60:1093–113.
- 609 [34] Maltepe E, Fisher SJ. Placenta: the forgotten organ. *Annu Rev Cell Dev Biol*  
610 2015;31:523–52.
- 611 [35] Herrera E, Ortega-Senovilla H. Lipid metabolism during pregnancy and its  
612 implications for fetal growth. *Curr Pharm Biotechnol* 2014;15:24–31.
- 613 [36] Chabrun F, Huetz N, Dieu X, Rousseau G, Bouzille G, Chao de la Barca JM, et  
614 al. Data-mining approach on transcriptomics and methylomics placental analysis  
615 highlights genes in fetal growth restriction. *Front Genet* 2019;10:1292.
- 616 [37] Paules C, Youssef L, Miranda J, Crovetto F, Estanyol JM, Fernandez G, et al.  
617 Maternal proteomic profiling reveals alterations in lipid metabolism in late-onset  
618 fetal growth restriction. *Sci Rep* 2020;10:21033.
- 619 [38] Zur RL, Kingdom JC, Parks WT, Hobson SR. The placental basis of fetal growth  
620 restriction. *Obstet Gynecol Clin North Am* 2020;47:81–98.
- 621 [39] Chassen S, Jansson T. Complex, coordinated and highly regulated changes in  
622 placental signaling and nutrient transport capacity in IUGR. *Biochim Biophys*  
623 *Acta Mol Basis Dis* 2020;1866:165373.
- 624 [40] Huppertz B, Peeters LL. Vascular biology in implantation and placentation.  
625 *Angiogenesis* 2005;8:157–67.
- 626 [41] Mayhew TM, Charnock-Jones DS, Kaufmann P. Aspects of human fetoplacental  
627 vasculogenesis and angiogenesis. III. Changes in complicated pregnancies.  
628 *Placenta* 2004;25:127–39.
- 629 [42] Chen CP, Bajoria R, Aplin JD. Decreased vascularization and cell proliferation  
630 in placentas of intrauterine growth-restricted fetuses with abnormal umbilical  
631 artery flow velocity waveforms. *Am J Obstet Gynecol* 2002;187:764–9.
- 632 [43] Manna D, Sarkar D. Multifunctional role of *astrocyte elevated gene-1 (AEG-1)*  
633 in cancer: focus on drug resistance. *Cancers (Basel)* 2021;13.
- 634 [44] Dhiman G, Srivastava N, Goyal M, Rakha E, Lothion-Roy J, Mongan NP, et al.  
635 Metadherin: a therapeutic target in multiple cancers. *Front Oncol* 2019;9:349.
- 636 [45] Melamed N, Baschat A, Yinon Y, Athanasiadis A, Mecacci F, Figueras F, et al.  
637 FIGO (international federation of gynecology and obstetrics) initiative on fetal  
638 growth: best practice advice for screening, diagnosis, and management of fetal  
639 growth restriction. *Int J Gynaecol Obstet* 2021;152:3–57.

- 640 [46] Smith GCS. Universal screening for foetal growth restriction. Best Pract Res  
641 Clin Obstet Gynaecol 2018;49:16–28.
- 642 [47] Hadlock FP, Harrist RB, Sharman RS, Deter RL, Park SK. Estimation of fetal  
643 weight with the use of head, body, and femur measurements - a prospective-study.  
644 Am J Obstet Gynecol 1985;151:333–7.
- 645 [48] Wyatt SM, Kraus FT, Roh CR, Elchalal U, Nelson DM, Sadovsky Y. The  
646 correlation between sampling site and gene expression in the term human  
647 placenta. Placenta 2005;26:372–9.
- 648 [49] Sood R, Zehnder JL, Druzin ML, Brown PO. Gene expression patterns in human  
649 placenta. Proc Natl Acad Sci U S A 2006;103:5478–83.
- 650 [50] Cox J, Mann M. MaxQuant enables high peptide identification rates,  
651 individualized p.p.b.-range mass accuracies and proteome-wide protein  
652 quantification. Nat Biotechnol 2008;26:1367–72.
- 653 [51] Magrane M. UniProt knowledgebase: a hub of integrated protein data. Database  
654 (Oxford) 2011;2011:bar009.
- 655 [52] Zhou T, Li C, Zhao W, Wang X, Wang F, Sha J. MaxReport: An enhanced  
656 proteomic result reporting tool for MaxQuant. PLoS One 2016;11:e0152067.
- 657 [53] Deutsch EW, Mendoza L, Shteynberg D, Farrah T, Lam H, Tasman N, et al. A  
658 guided tour of the Trans-Proteomic Pipeline. Proteomics 2010;10:1150–9.
- 659 [54] Cattaneo MG, Lucci G, Vicentini LM. Oxytocin stimulates *in vitro* angiogenesis  
660 via a Pyk-2/Src-dependent mechanism. Exp Cell Res 2009;315:3210–9.
- 661 [55] Ma J, Chen T, Wu S, Yang C, Bai M, Shu K, et al. iProX: an integrated proteome  
662 resource. Nucleic Acids Res 2019;47:D1211–7.
- 663 [56] Chen T, Chen X, Zhang S, Zhu J, Tang B, Wang A, et al. The genome sequence  
664 archive family: toward explosive data growth and diverse data types. Genomics  
665 Proteomics Bioinformatics 2021;19:578–83.
- 666

667 **Figure Legends**

668 **Figure 1 Identification and biofunction analysis of DEPs in IUGR twin**  
669 **placentas**

670 **A.** Proteomic workflow for placental tissues from normal cotwins and IUGR twins.  
671 Twelve samples from 6 sIUGR pregnancies were enrolled in this study and labeled  
672 with two sets of six-plex TMT reagents. **B.** Histogram plot showing the  $\log_2$  FC  
673 distribution of all identified proteins. **C.** Volcano plot of DEPs between IUGR twin  
674 placentas and normal cotwin placentas. DEPs were selected with  $P < 0.05$  and  $|FC| >$   
675 1.3. Red spots indicate the downregulated DEPs, blue spots represent the upregulated  
676 DEPs, and gray spots indicate proteins without significantly different expression. **D.**  
677 Heatmap of the DEPs identified in IUGR twin placentas. Proteins are represented by  
678 rows, and samples by columns. **E.** Functional analysis of the DEPs in IUGR twin  
679 placentas using IPA software. DEPs, differentially expressed proteins; IUGR,  
680 intrauterine growth restriction; sIUGR, selective IUGR; RPLC, reverse-phase liquid  
681 chromatography; FC, fold change; LC-MS/MS, liquid chromatography tandem mass  
682 spectrometry; N, normal cotwin; I, IUGR twin; TMT, tandem mass tag; IPA,  
683 ingenuity pathway analysis.

684

685 **Figure 2 Impairment of angiogenesis in IUGR twin placentas**

686 **A.** IPA identified the “angiogenesis” annotation to be affected in IUGR twin placentas.  
687 **B.** Immunostaining of CD34 in human placentas from IUGR twins and normal  
688 cotwins. CD34 is limited to endothelial cells. Scale bar, 50  $\mu\text{m}$ . **C.** Placental MVD in  
689 IUGR twins and normal cotwins. **D.** Placental vascular area density in IUGR twins  
690 and normal cotwins. **E.** Immunohistochemical images of *EFNB2*, *VIM*, and *METAP2*  
691 in placental shares from IUGR twins and normal cotwins. Scale bar, 100  $\mu\text{m}$ . **F–H.**  
692 *EFNB2*, *VIM*, and *METAP2* immunostaining intensity per tissue area is represented  
693 by the fold-decrease relative to the normal control mean. **I–K.** qRT-PCR analysis  
694 showed that the *EFNB2*, *VIM*, and *METAP2* transcriptional levels were significantly  
695 lower in placentas of IUGR twins compared with normal cotwins. All data are shown

696 as mean  $\pm$  SD with 6 samples per group. \*,  $P < 0.05$ ; \*\*,  $P < 0.01$ ; \*\*\*,  $P < 0.001$ .  
697 MVD, microvessel density; NC, negative control; SD, standard deviation.

698

699 **Figure 3 *MTDH* expression is downregulated in IUGR twin placentas, and**  
700 ***MTDH* knockdown impairs HUVECs proliferation and migration**

701 **A.** *MTDH* mRNA levels in IUGR twin placentas (n = 6) and normal cotwin placentas  
702 (n = 6) by qRT-PCR analysis. **B.** *MTDH* expression in placental shares of IUGR twins  
703 and normal cotwins by immunohistochemistry. Scale bar, 100  $\mu$ m. **C.** *MTDH*  
704 immunostaining intensity in IUGR twin and normal cotwin placentas (n = 6 in each  
705 group). **D–F.** After transfection for 48 h, the interference efficiency of siRNA  
706 targeting *MTDH* in HUVECs was evaluated by qRT-PCR (**D**) and western blotting  
707 (**E**). The relative intensity of *MTDH* levels was evaluated by ImageJ from three  
708 independent experiments (**F**). **G.** Proliferation curves showed that *MTDH* knockdown  
709 greatly inhibited HUVECs proliferation. Two-way ANOVA was used for data analysis.  
710 **H.** Migration curves revealed that *MTDH* knockdown greatly inhibited HUVECs  
711 migration. Two-way ANOVA was used for data analysis. **I–J.** Knockdown of *MTDH*  
712 in HUVECs decreased the rate of wound closure. Scale bar, 100  $\mu$ m. All experiments  
713 had 3 replicates with results shown as mean  $\pm$  SD. \*,  $P < 0.05$ ; \*\*,  $P < 0.01$ ; \*\*\*,  $P <$   
714 0.001. ANOVA, analysis of variance.

715

716 **Figure 4 *MTDH* knockdown inhibits HUVECs tube formation and spheroid**  
717 **sprouting**

718 **A.** HUVECs were harvested 48 h after transfection with si-NC or si-*MTDH* and then  
719 plated in Matrigel-coated wells. After 8 h, HUVEC tube formation was observed  
720 under a LeicaDMI4000B microscope and photographed. Scale bar, 100  $\mu$ m. **B–E.**  
721 Quantification of the number of tubes (**B**), total tube length (**C**), total tube area (**D**),  
722 and number of branching points (**E**) in the si-*MTDH* group and the si-NC group using  
723 ImageJ software. The results were from three independent assays. **F.** si-NC or  
724 si-*MTDH* transfected HUVECs spheroids were photographed 48 h later after  
725 embedding in collagen gels. Scale bar, 100  $\mu$ m. **G.** ImageJ software was used to



726 quantify the cumulative sprout length in the si-*MTDH* group and the si-NC group. All  
727 data are expressed as mean  $\pm$  SD from 3 experiments. \*\*,  $P < 0.01$ ; \*\*\*,  $P < 0.001$ .

728

729 **Figure 5 RNA-seq analysis of HUVECs following *MTDH* interference**

730 **A.** Correlation coefficient analysis based on RNA-seq data for each sample pair.

731 Three replicates per condition. **B.** Heatmap of the top 50 differentially expressed

732 protein-coding genes between si-*MTDH* group and si-NC group. Genes are

733 represented by rows, and samples by columns. **C.** Bubble plot depicting biological

734 process enrichment for 50 candidates by gene ontology. **D.** Interaction network of the

735 50 candidate genes. The network was constructed by GeneMANIA and visualized

736 using Cytoscape 3.7.2.

737

738

739

740 **Supplementary material**

741 **Figure S1 Clinical characteristics and placental histopathology of sIUGR twins**

742 **A–B.** Representative images of ultrasound biometric measurements of the normal

743 cotwin (**A**) and the IUGR twin (**B**) from a sIUGR pregnancy, including BPD, HC, AC,

744 and FL. **C.** Ultrasound estimated fetal weight of the normal cotwins and the IUGR

745 twins from six pairs of sIUGR pregnancies throughout gestation were plotted on the

746 fetal growth curve. **D.** Birth weight of the normal cotwins and the IUGR twins ( $n = 6$

747 in each group). **E.** Normal placental parenchyma from the normal cotwin. Scale bar,

748 100  $\mu\text{m}$ . **F.** Distal villous hypoplasia in the IUGR twin placenta. Scale bar, 100  $\mu\text{m}$ . **G.**

749 Increased fibrin deposition (arrow) in the IUGR twin placenta. Scale bar, 100  $\mu\text{m}$ . **H.**

750 Increased syncytial knots (arrow) in the IUGR twin placenta. Scale bar, 100  $\mu\text{m}$ . **I.** A

751 representative image of sIUGR twin placenta after dye injection. Placental sharing

752 was indicated by the white dotted line. Velamentous cord insertion was observed in

753 the IUGR twin. \*\*\*,  $P < 0.001$ . BPD, biparietal diameter; HC, head circumference;

754 AC, abdominal circumference; FL, femur length.

755

756 **Figure S2 Bioinformatic analysis of the DEPs in IUGR twin placentas by IPA**  
757 **software**

758 **A.** DEPs significantly enriched in the “molecular and cellular function” category. **B.**  
759 DEPs significantly enriched in the “disease and disorder” category. **C.** Canonical  
760 pathway analysis of the DEPs.

761

762 **Table S1 Clinical features of 6 sIUGR twins**

763

764 **Table S2 Detailed information on 5481 nonredundant proteins identified in**  
765 **siIUGR twin placentas**

766

767 **Table S3 Detailed information on 233 DEPs in IUGR twin placentas**

768

769 **Table S4 Detailed information on the biofunction analysis by IPA**

770

771 **Table S5 The top 50 differentially expressed protein-coding genes between the**  
772 **si-*MTDH* group and the si-NC group**

773

774 **Table S6 Primers used for qRT-PCR**

**A**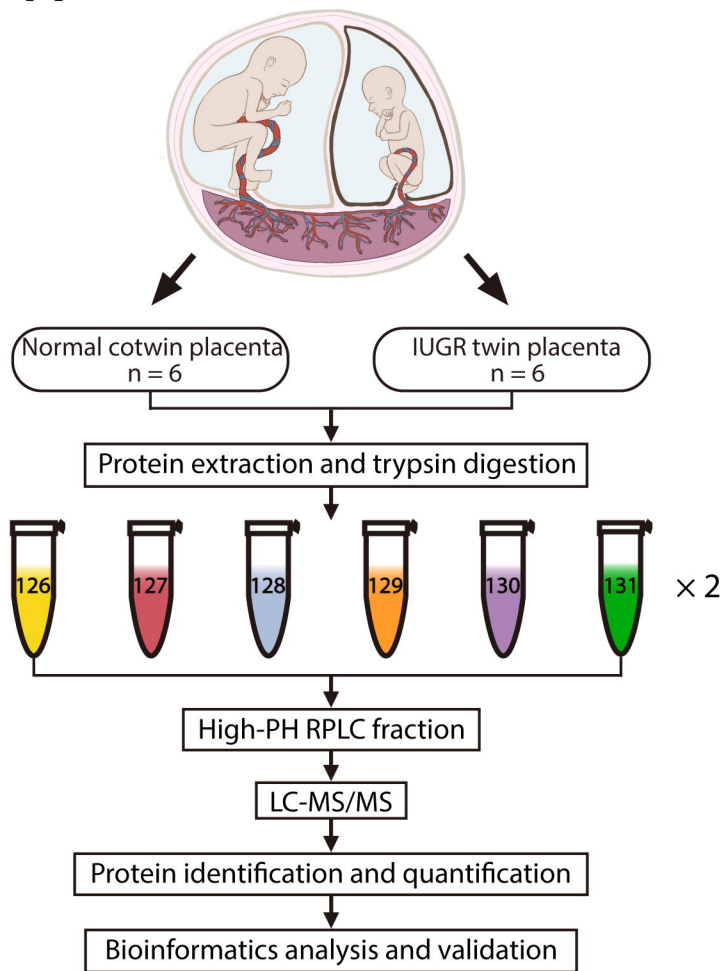**B**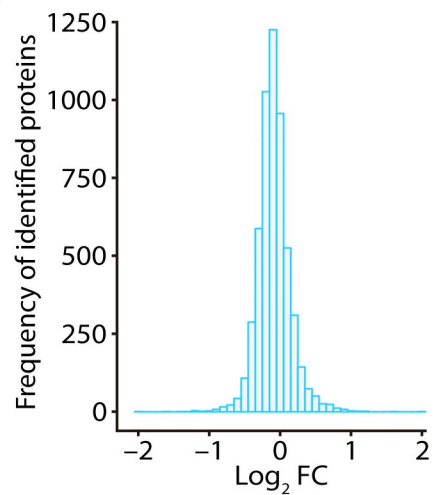**C**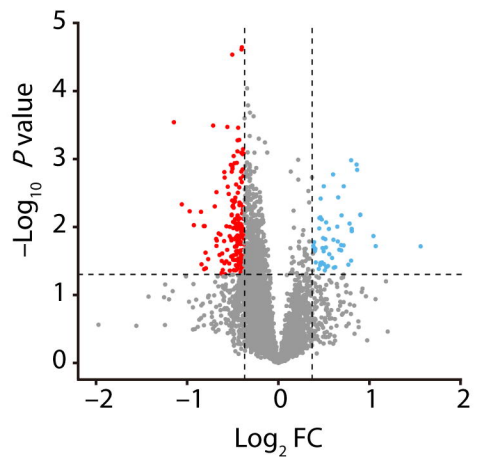**D**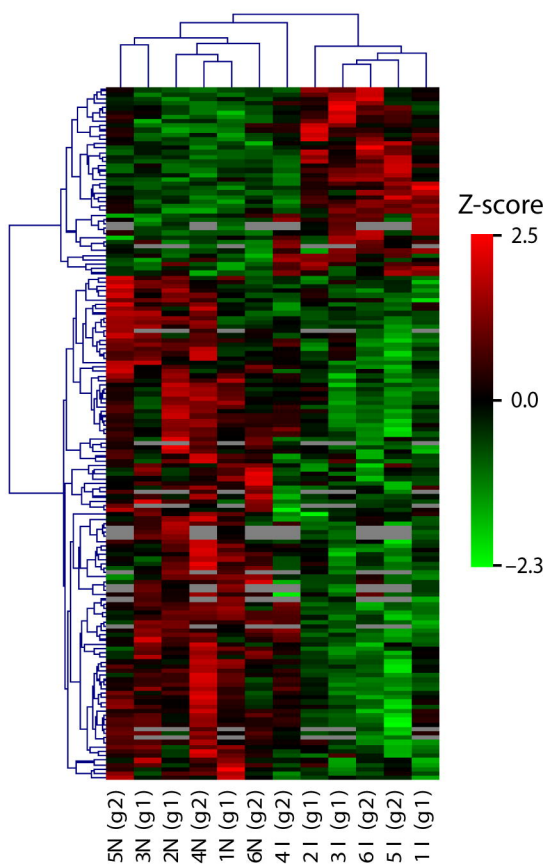**E**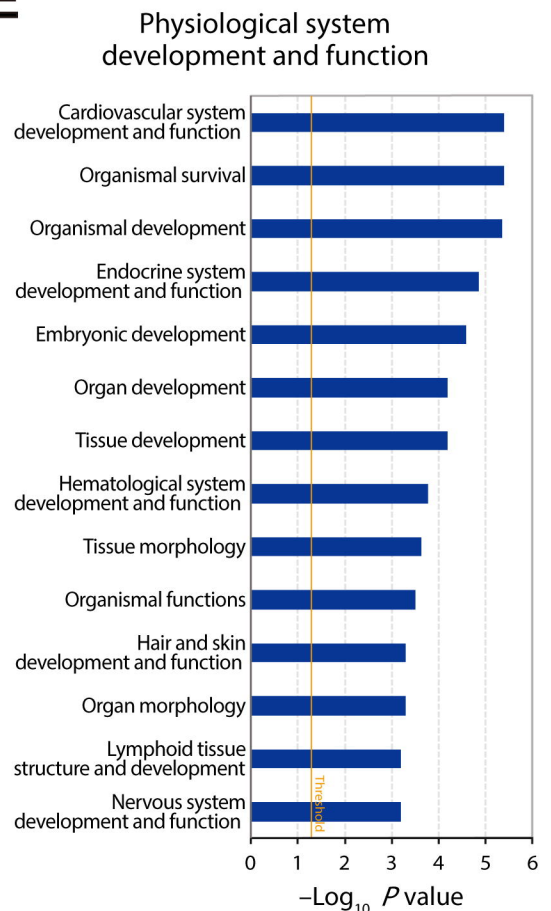

**A**

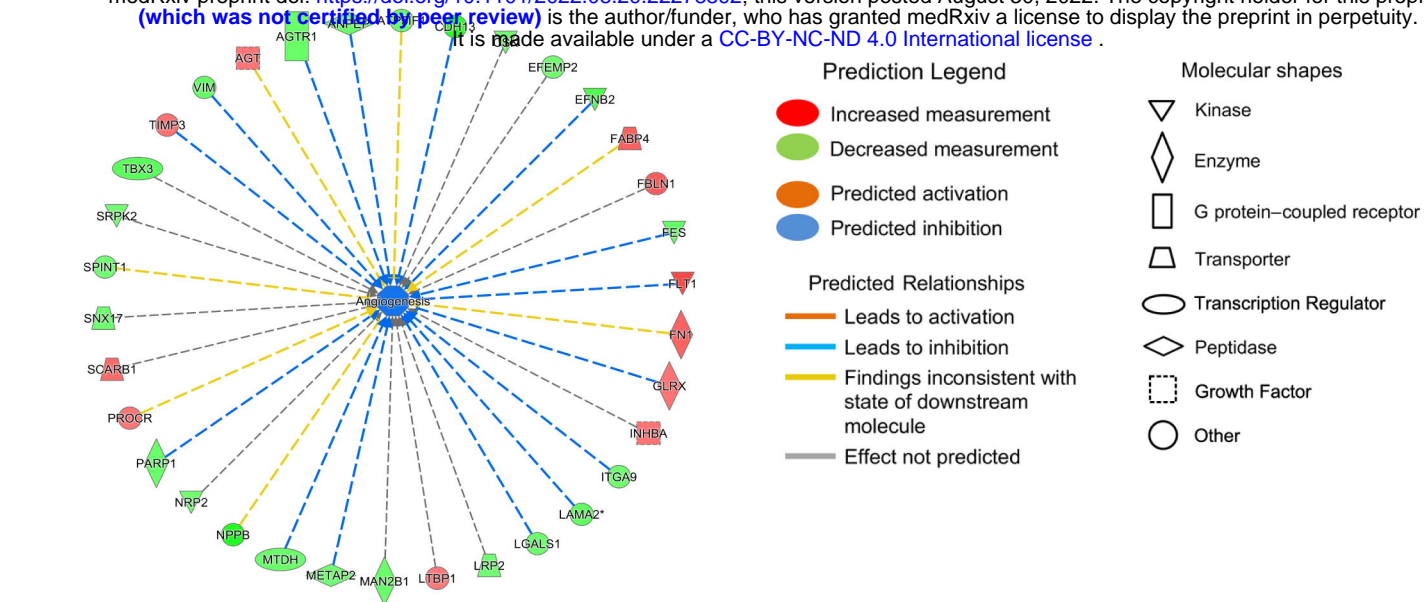

**B**

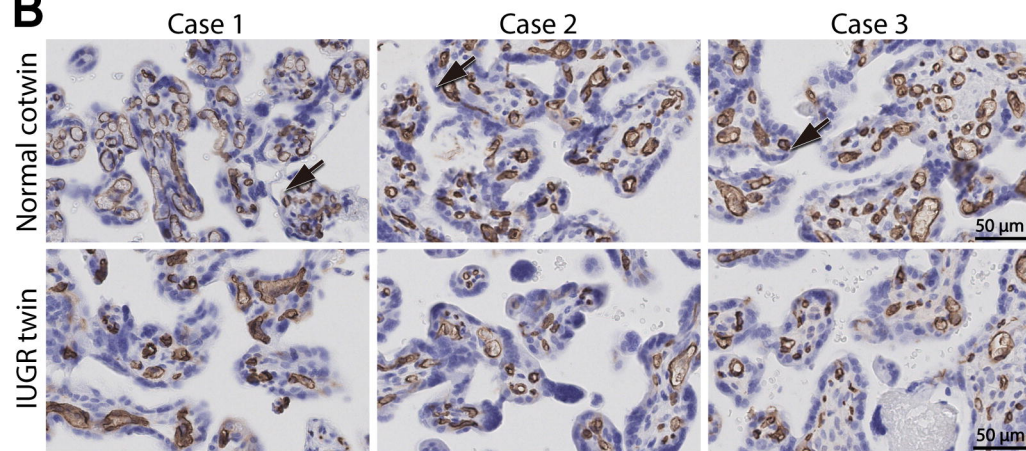

**C**

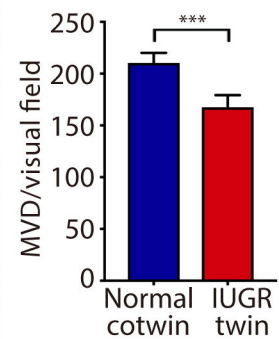

**D**

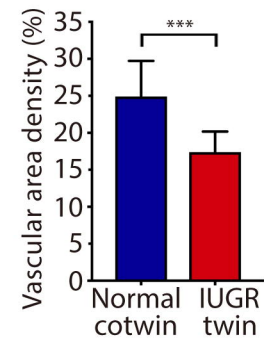

**E**

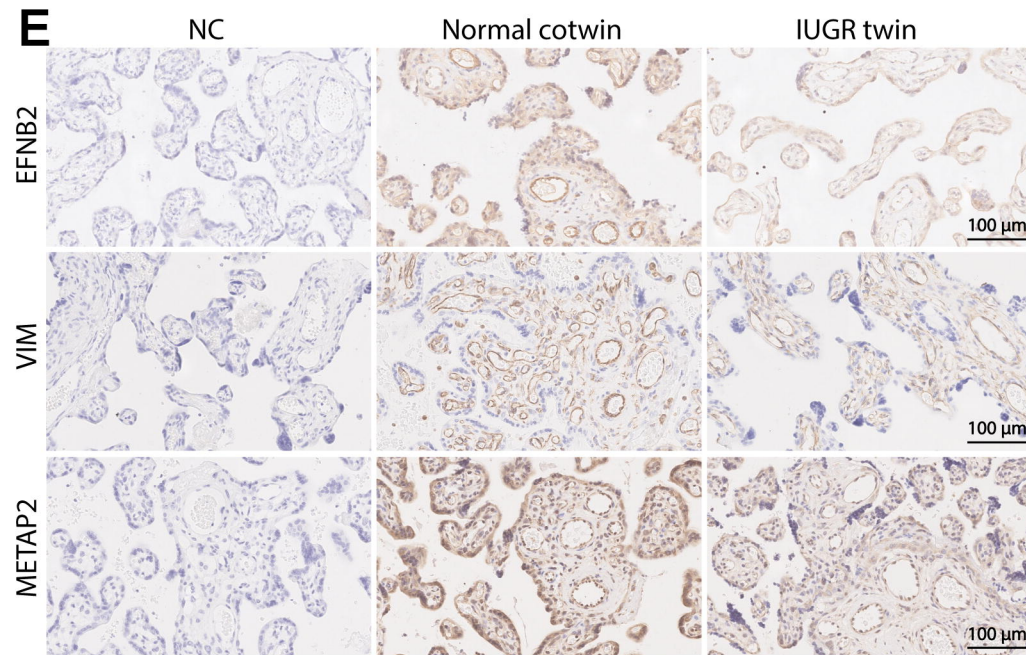

**F**

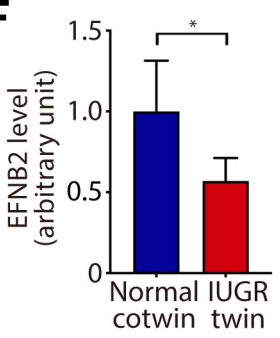

**G**

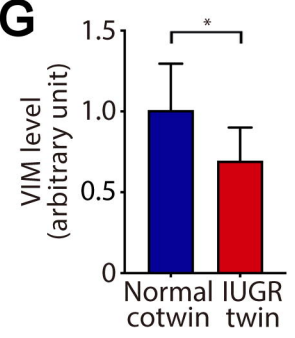

**H**

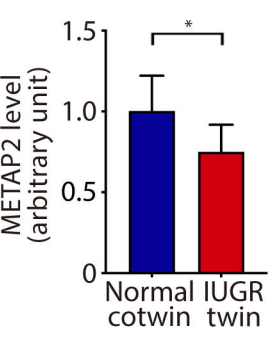

**I**

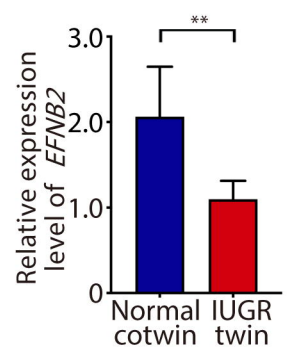

**J**

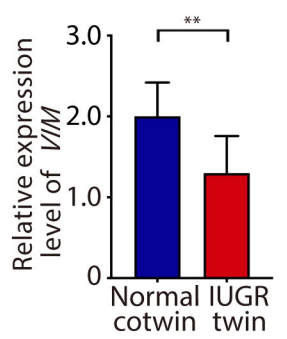

**K**

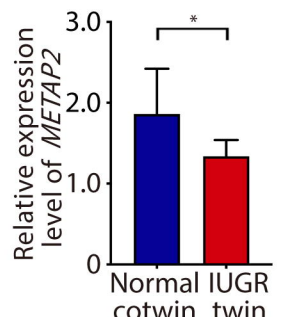

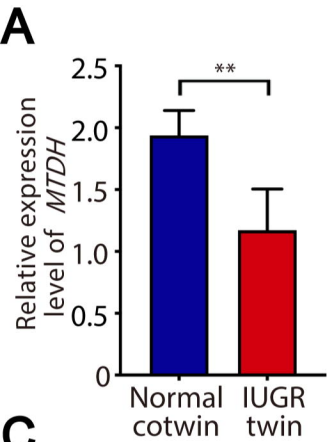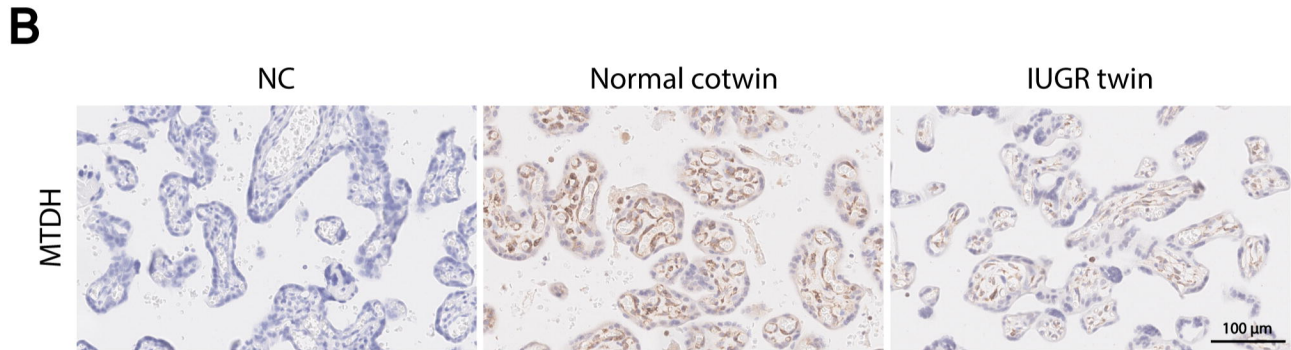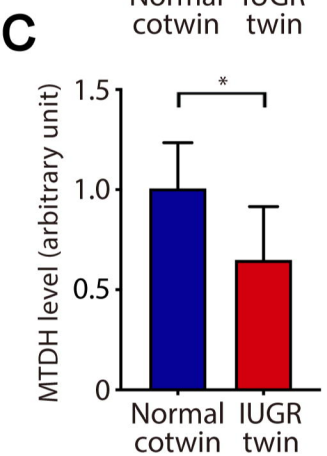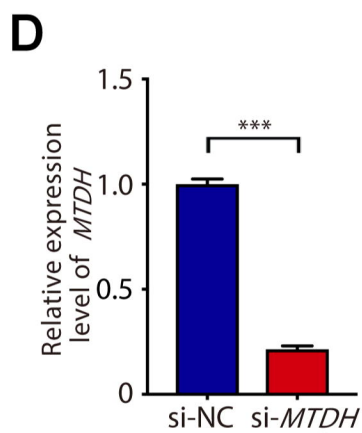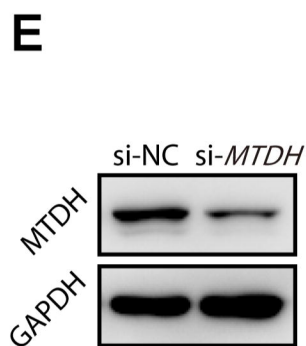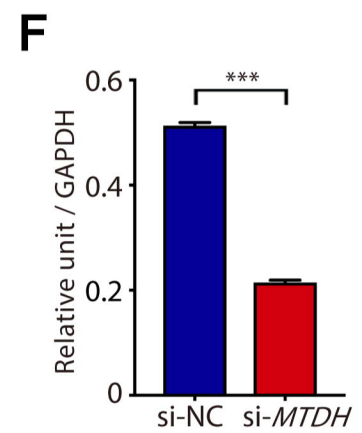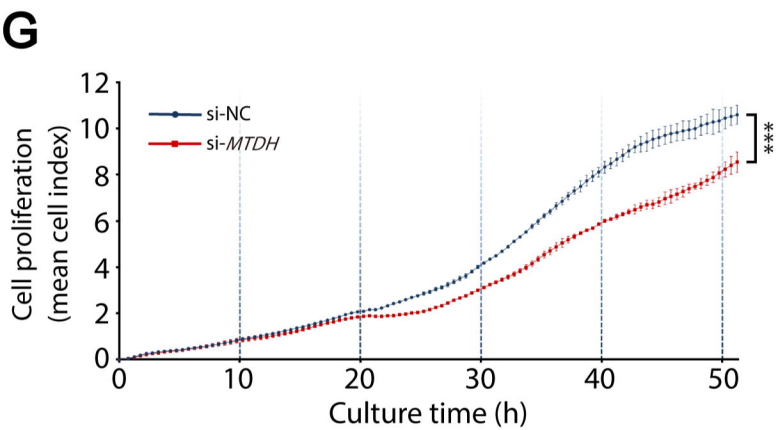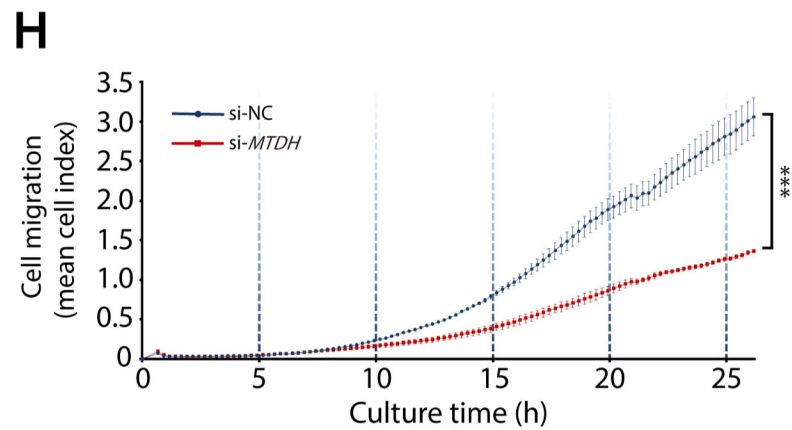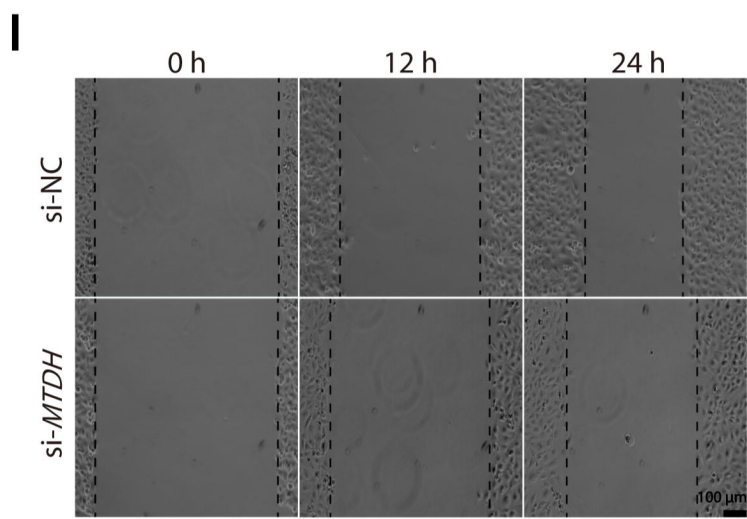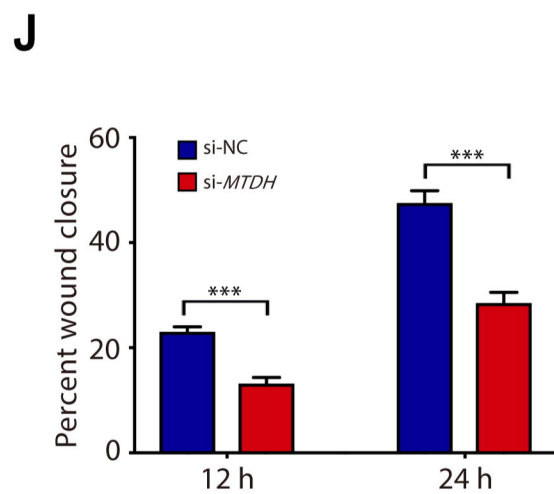

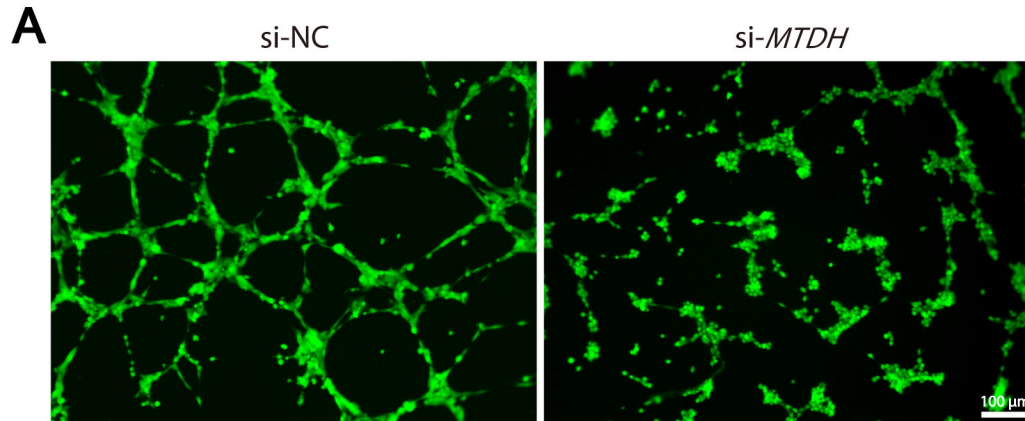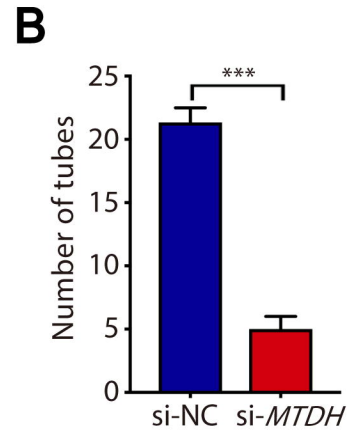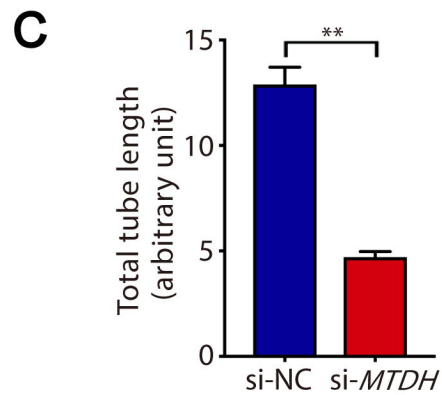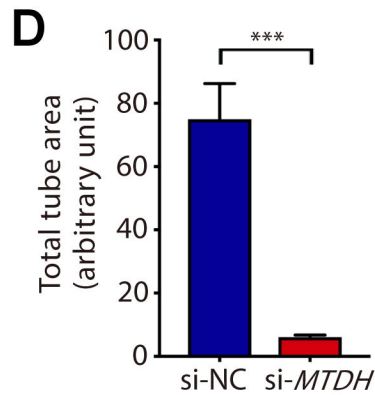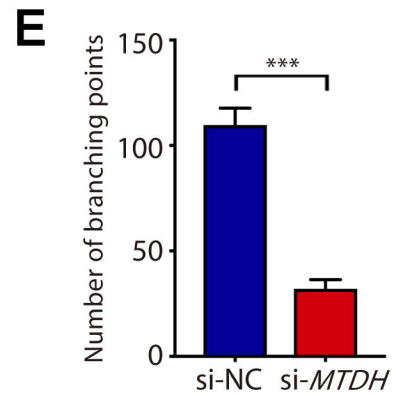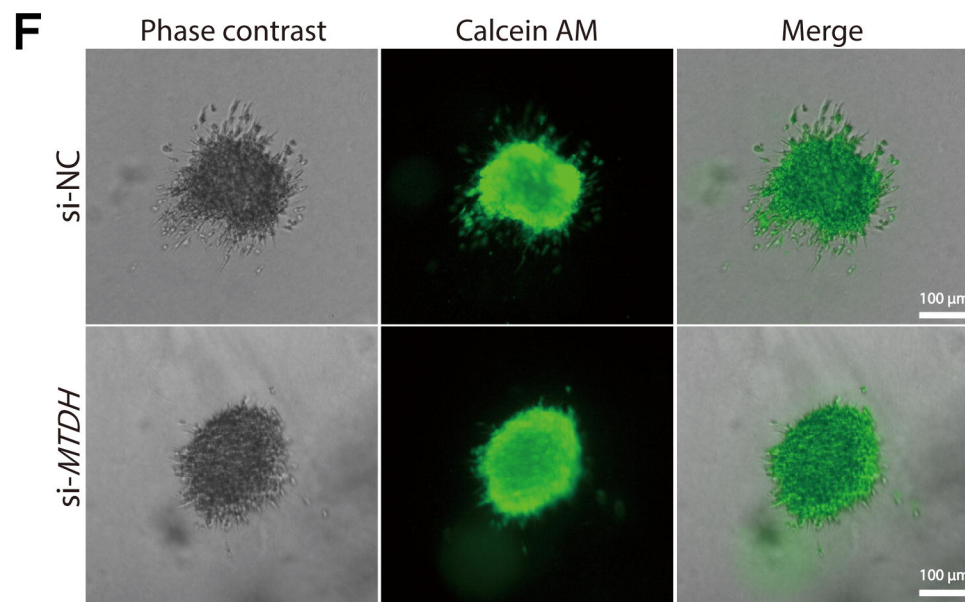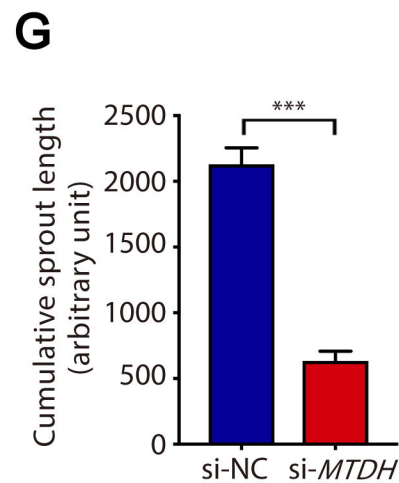

**A**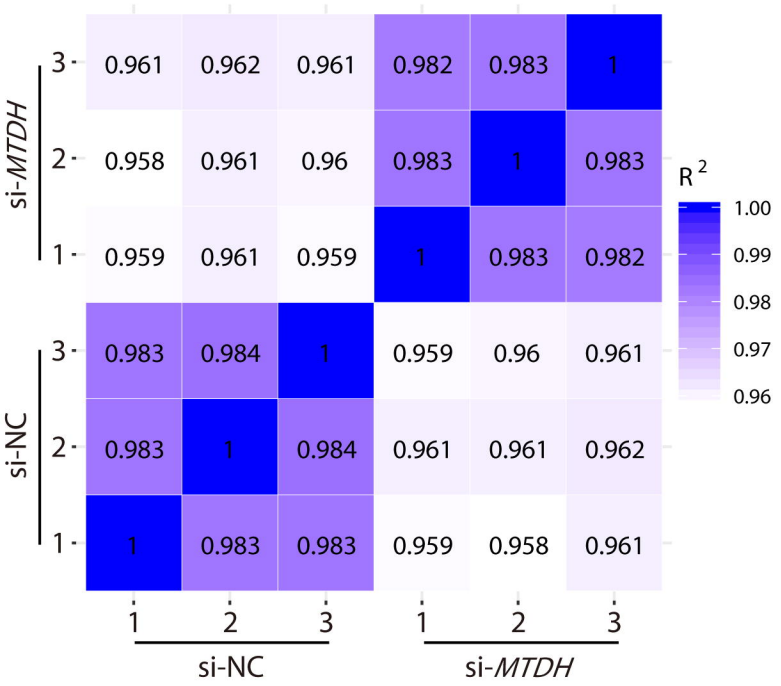**B**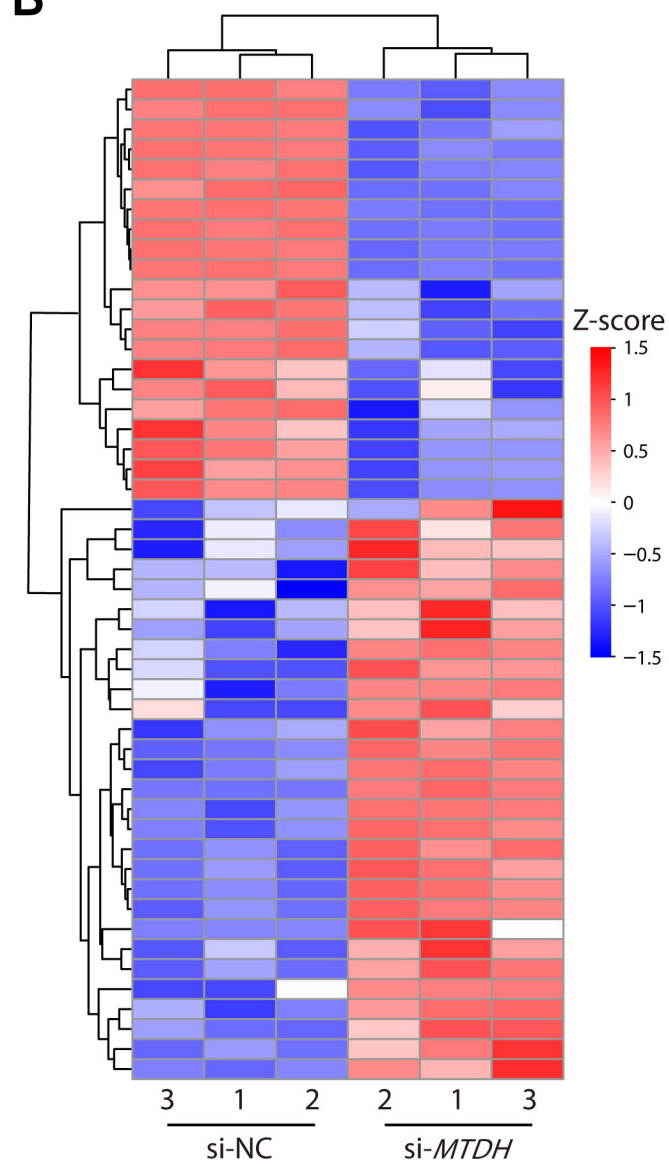**C**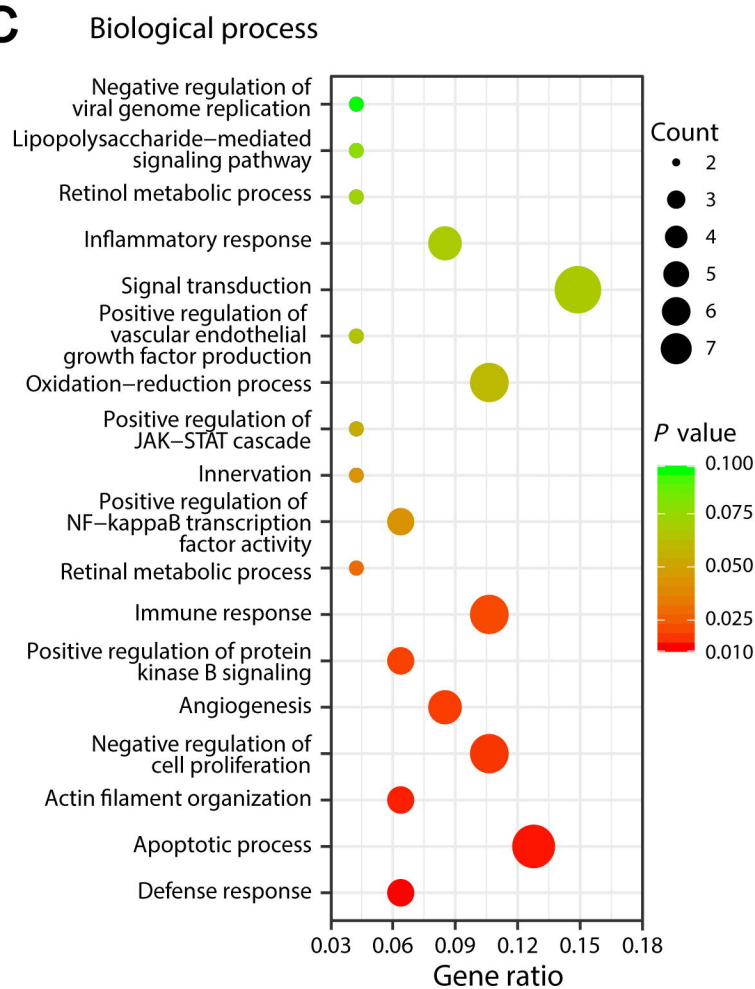**D**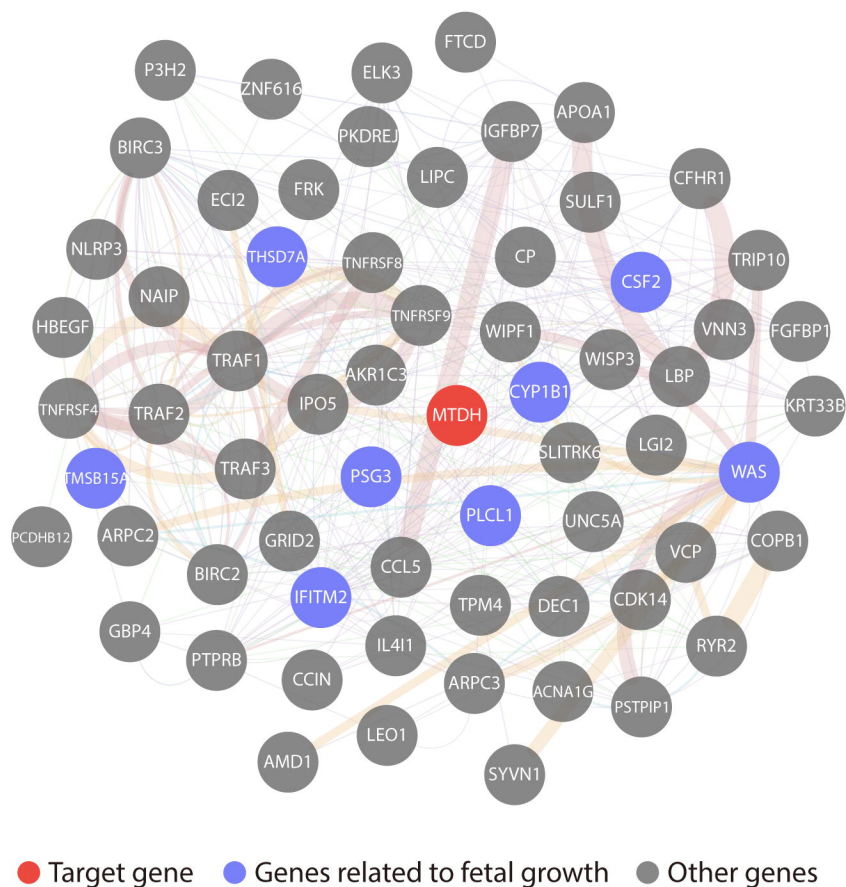

Source: https://medrxiv.org/content/medrxiv/early/2022/08/30/2022.08.29.22278892.full.pdf
